# Supplementary material
Source: HighWire-hosted journal article supplement (https://www.jneurosci.org/highwire/filestream/598967/field_highwire_adjunct_files/0/Supplemental_Table.pdf)
Supplement: Supplemental_Table.pdf [file Supplemental_Table.pdf]

**Table 1: Rate and Equilibrium Constants for the Human 5-HT<sub>3A</sub> Receptor Model for 5-HT and DA**

| KINETIC PARAMETER | 5-HT                                        | DA                                          |
|-------------------|---------------------------------------------|---------------------------------------------|
| $k_1$             | $1 \times 10^7 \text{ M}^{-1}\text{s}^{-1}$ | $1 \times 10^7 \text{ M}^{-1}\text{s}^{-1}$ |
| $k_2$             | $200 \text{ s}^{-1}$                        | $1700 \text{ s}^{-1}$                       |
| $k_3$             | $0.207 \text{ s}^{-1}$                      | $14 \text{ s}^{-1}$                         |
| $\beta$           | $400 \text{ s}^{-1}$                        | $0.6 \text{ s}^{-1}$                        |
| $\alpha$          | $1 \text{ s}^{-1}$                          | $1.2 \text{ s}^{-1}$                        |
| $k_{d+}$          | $1.15 \text{ s}^{-1}$                       | $1.15 \text{ s}^{-1}$                       |
| $k_{d-}$          | $<0.01 \text{ s}^{-1}$                      | $<0.01 \text{ s}^{-1}$                      |
| $k_{DR}$          | $0.7 \text{ s}^{-1}$                        |                                             |
| $L_0$             | $3 \times 10^6$                             |                                             |

Kinetic parameters for the model were constrained by the electrophysiological data presented in the figures or thermodynamic law. The value of  $k_{d-}$  is an upper limit estimate based upon the inability to measure steady-state currents following equilibration with  $100 \mu\text{M}$  5-HT or  $1 \text{ mM}$  DA.
